# Supplementary material for: CCR2+ migratory macrophages with M1 status are the early-responders in the cornea of HSV-1 infected mice
Source: PubMed Central journal article supplement (PMC6472814; doi:10.1371/journal.pone.0215727), 2019-04-18
Supplement: pone.0215727.s001.pdf [file pone.0215727.s001.pdf]

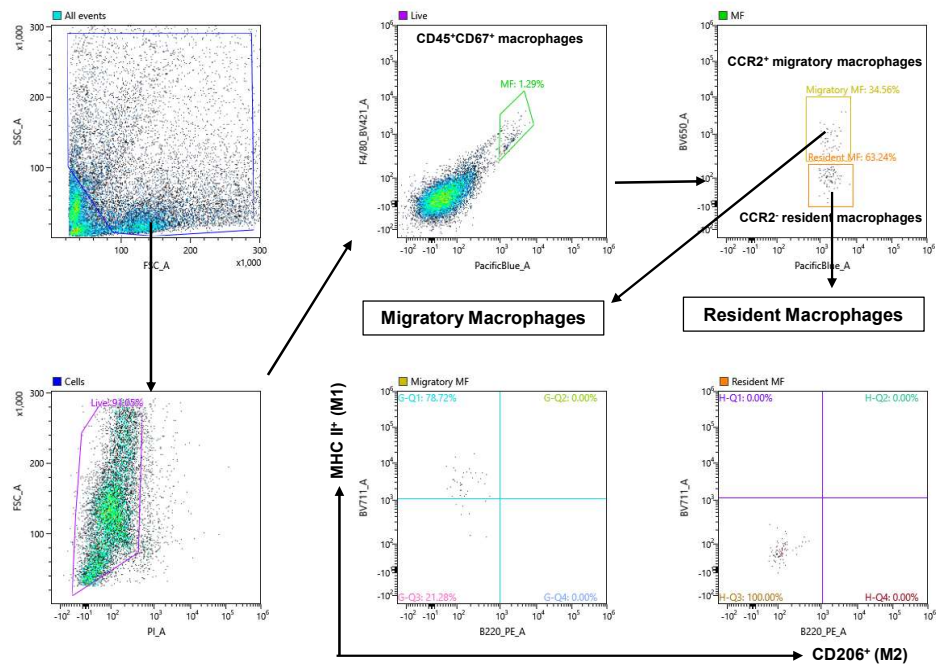

S1 Fig. Gating Strategy of 6-color macrophage panel on day 21 post infection.
