# Supplementary material for: CCR2+ migratory macrophages with M1 status are the early-responders in the cornea of HSV-1 infected mice
Source: PubMed Central journal article supplement (PMC6472814; doi:10.1371/journal.pone.0215727), 2019-04-18
Supplement: pone.0215727.s002.pdf [file pone.0215727.s002.pdf]

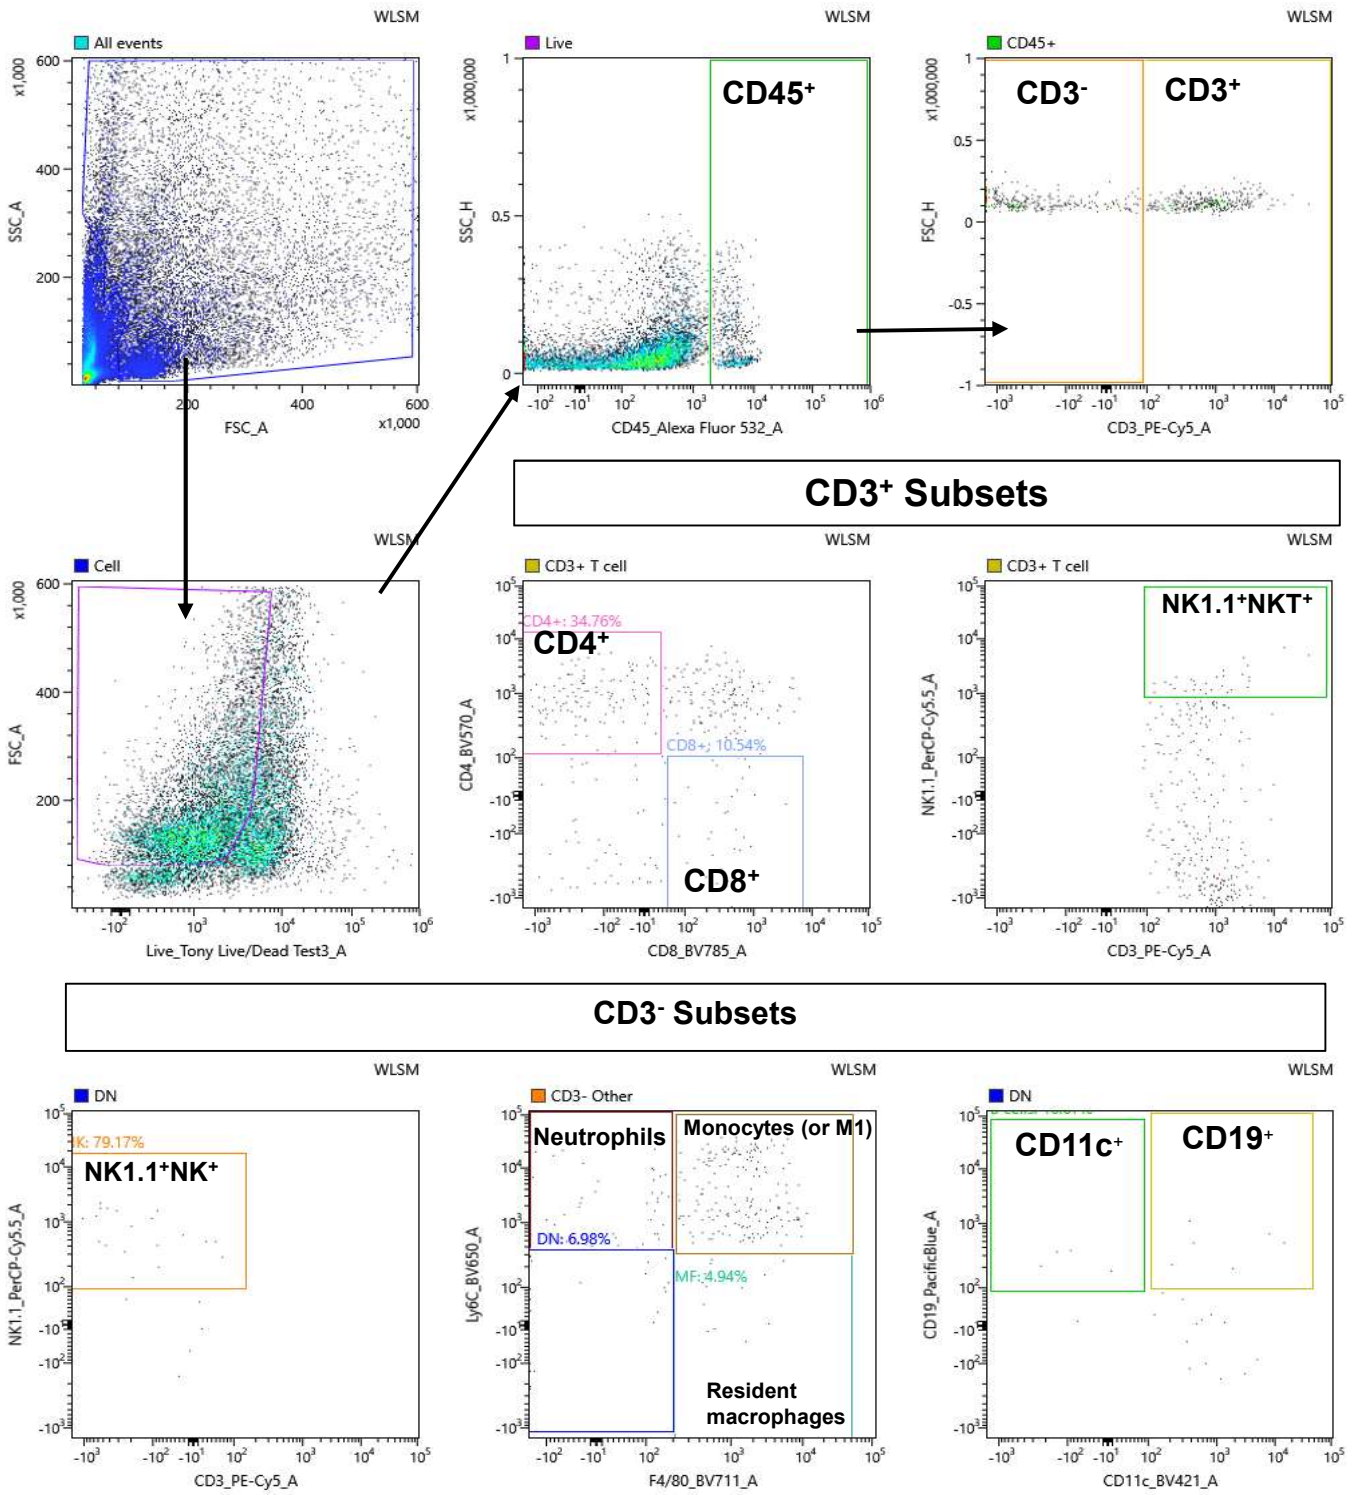

**S2 Fig.** Gating Strategy of 9-color immune cell panel on day 21 post infection.
